# Supplementary material for: Stabilization of Intrinsically Disordered DKK2 Protein by Fusion to RNA-Binding Domain
Source: Int J Mol Sci. 2019 Jun 11;20(11):2847. doi: 10.3390/ijms20112847 (PMC6600415; doi:10.3390/ijms20112847)
Supplement: Supplementary file 1 [file ijms-20-02847-s001.pdf]

**A**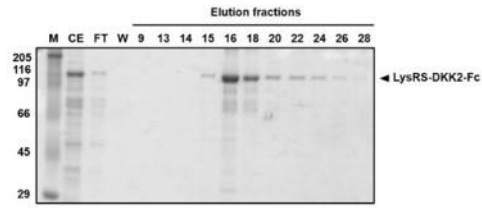**B**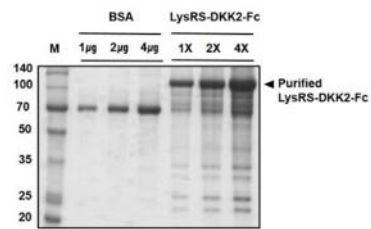

**Figure S1.** Purification and quantification of DKK2-Fc fusion protein. **(A)** Purification of LysRS-DKK2-Fc by affinity chromatography. CE, FT, and W represent crude extract, flow-through, and washing fraction, respectively. **(B)** Quantification of the purified LysRS-DKK2-Fc. The overall purification yield was ~ 2 mg from 1 L of *E. coli* culture.

**A**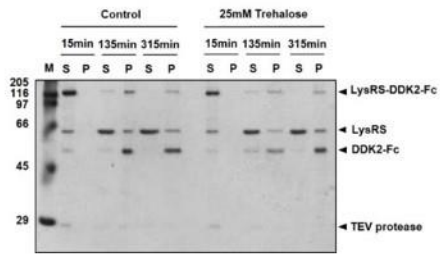**B**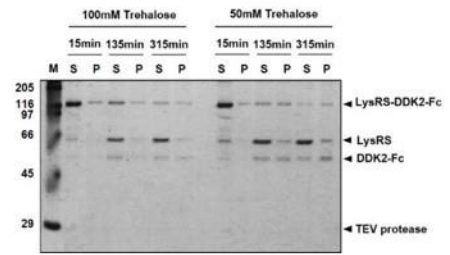**C**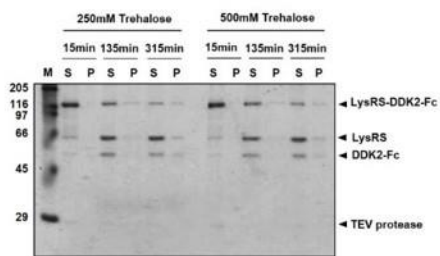

**Figure S2.** TEV protease cleavage of LysRS-DDK2-Fc fusion protein by treating with increasing concentrations of trehalose. (A–C) The fusion protein was cleaved by TEV protease with 25, 50, 100, 250, or 500 mM trehalose in pH 9.0 buffer at 25°C.

**A**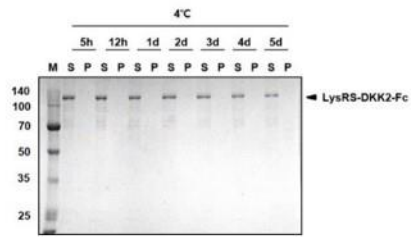**B**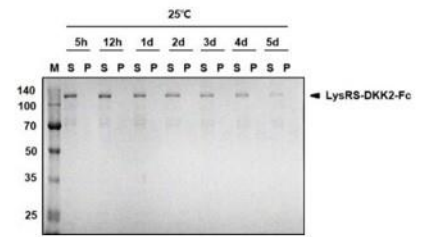**C**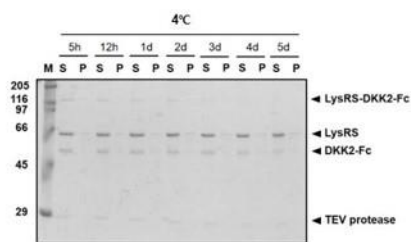**D**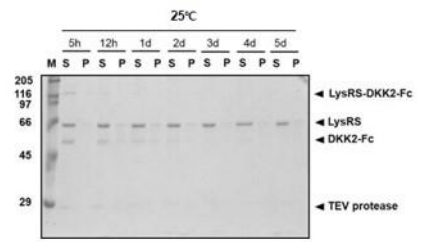

**Figure S3.** Stability of DKK2 in diverse storage conditions. LysRS-DKK2-Fc and TEV-cleaved LysRS-DKK2-Fc were stored for up to 5 days at 4°C (**A** and **C**, respectively) and 25°C (**B** and **D**, respectively).
